# Supplementary material
Source: publisher figshare collection journal article supplement (https://acs.figshare.com/ndownloader/files/5718987)
Supplement: Supplementary file 1 [file 5718987]

# ja0021161.cif

data_[Cp*RuCl(SMe)2Cp*Ru(CCCTol

#------------------------------------------------------------------------------

_audit_creation_date                  'Tue Mar 21 11:36:40 2000'

_audit_creation_method                'from TEXRAY.INF file'

_audit_update_record                   ?

#------------------------------------------------------------------------------

_computing_data_collection            'Rigaku/AFC Diffractometer Control'

_computing_cell_refinement            'Rigaku/AFC Diffractometer Control'

_computing_data_reduction             'teXsan'

_computing_structure_solution          ?

_computing_structure_refinement       'teXsan'

_computing_publication_material       'teXsan'

_computing_molecular_graphics          ?

#------------------------------------------------------------------------------

_chemical_compound_source              ?

_chemical_name_common                  ?

_chemical_formula_weight               999.48

_chemical_formula_analytical           ?

_chemical_formula_sum                  'C43 H62 B Cl F4 O2 S2 Ru2 '

_chemical_formula_moiety               '?'

_chemical_formula_structural           ?

_chemical_melting_point                ?

#------------------------------------------------------------------------------

_cell_length_a                         9.532(6)

_cell_length_b                         24.712(8)

_cell_length_c                         38.47(1)

_cell_angle_alpha                      90

_cell_angle_beta                       90

_cell_angle_gamma                      90

_cell_volume                           9062(7)

_cell_formula_units_Z                  8

_cell_measurement_temperature          296.2

_cell_measurement_reflns_used          19

_cell_measurement_theta_min            11.1

_cell_measurement_theta_max            12.3

#------------------------------------------------------------------------------

_symmetry_cell_setting                 orthorhombic

_symmetry_space_group_name_H-M        'C 2 2 21     '

_symmetry_Int_Tables_number            20

_symmetry_space_group_name_Hall        ?

loop_

_symmetry_equiv_pos_as_xyz

x,y,z

x,-y,-z

-x,-y,1/2+z

-x,y,1/2-z

1/2+x,1/2+y,z

1/2+x,1/2-y,-z

1/2-x,1/2-y,1/2+z

1/2-x,1/2+y,1/2-z

#------------------------------------------------------------------------------

_exptl_crystal_description            'prismatic'

_exptl_crystal_colour                 'black'

_exptl_crystal_size_max                0.250

_exptl_crystal_size_mid                0.200

_exptl_crystal_size_min                0.000

_exptl_crystal_density_diffrn          1.465

_exptl_crystal_density_method         'not measured'

_exptl_crystal_F_000                   4112.00

_exptl_absorpt_coefficient_mu          0.868

_exptl_absorpt_correction_type         psi-scan

_exptl_absorpt_process_details        '(North, Phillips & Mathews, 1968)'

_exptl_absorpt_correction_T_min        0.742

_exptl_absorpt_correction_T_max        0.988

_exptl_special_details

;

 ?

;

#------------------------------------------------------------------------------

_diffrn_special_details

;

 ?

;

_diffrn_ambient_temperature            296.2

_diffrn_radiation_wavelength           0.7107

_diffrn_radiation_type                'Mo K\a'

_diffrn_radiation_source              'Rigaku rotating anode'

_diffrn_radiation_monochromator        graphite

_diffrn_radiation_detector            'scintillation counter'

_diffrn_measurement_device_type       'Rigaku AFC7R'

_diffrn_measurement_method             \w-2\q


_diffrn_standards_number              3

_diffrn_standards_interval_count      150

_diffrn_standards_decay_%             -0.98

loop_

_diffrn_standard_refln_index_h

_diffrn_standard_refln_index_k

_diffrn_standard_refln_index_l

      0      -2      6

     -1      -3      0

      0       0      6

_diffrn_reflns_number                  5708

_reflns_number_total                   5708

_reflns_number_gt                      2560

_reflns_observed_expression             >2.0sigma(I)

_diffrn_reflns_av_R_equivalents        0.000

_diffrn_reflns_av_sigmaI/netI          0.148

_diffrn_reflns_limit_h_min             0

_diffrn_reflns_limit_h_max             12

_diffrn_reflns_limit_k_min             0

_diffrn_reflns_limit_k_max             32

_diffrn_reflns_limit_l_min             0

_diffrn_reflns_limit_l_max             49

_diffrn_reflns_theta_min               2.52

_diffrn_reflns_theta_max               27.50

_diffrn_reflns_reduction_process      'Lp corrections applied'

_diffrn_orient_matrix_UB_11            0.00250

_diffrn_orient_matrix_UB_12           -0.02673

_diffrn_orient_matrix_UB_13            0.01951

_diffrn_orient_matrix_UB_21           -0.00048

_diffrn_orient_matrix_UB_22            0.03037

_diffrn_orient_matrix_UB_23            0.01717

_diffrn_orient_matrix_UB_31           -0.10488

_diffrn_orient_matrix_UB_32           -0.00078

_diffrn_orient_matrix_UB_33            0.00037

#------------------------------------------------------------------------------

loop_

_atom_type_symbol

_atom_type_description

_atom_type_scat_dispersion_real

_atom_type_scat_imag

_atom_type_scat_source

  'C'  'C'   0.003 0.002

;International Tables for Crystallography

(1992, Vol. C, Tables 4.2.6.8 and 6.1.1.1)

;

  'H'  'H'   0.000 0.000

;International Tables for Crystallography

(1992, Vol. C, Table 6.1.1.2)

;

  'B'  'B'   0.001 0.001

;International Tables for Crystallography

(1992, Vol. C, Tables 4.2.6.8 and 6.1.1.1)

;

  'ClCl'   0.148 0.159

;International Tables for Crystallography

(1992, Vol. C, Tables 4.2.6.8 and 6.1.1.1)

;

  'F'  'F'   0.017 0.010

;International Tables for Crystallography

(1992, Vol. C, Tables 4.2.6.8 and 6.1.1.1)

;

  'RuRu'   -1.259 0.836

;International Tables for Crystallography

(1992, Vol. C, Tables 4.2.6.8 and 6.1.1.1)

;

  'S'  'S'   0.125 0.123

;International Tables for Crystallography

(1992, Vol. C, Tables 4.2.6.8 and 6.1.1.1)

;

  'O'  'O'   0.011 0.006

;International Tables for Crystallography

(1992, Vol. C, Tables 4.2.6.8 and 6.1.1.1)

;

#------------------------------------------------------------------------------

loop_

_atom_site_label

_atom_site_type_symbol

_atom_site_fract_x

_atom_site_fract_y

_atom_site_fract_z

_atom_site_U_iso_or_equiv

_atom_site_adp_type

_atom_site_occupancy

_atom_site_calc_flags

_atom_site_refinement_flags

_atom_site_disorder_assembly

_atom_site_disorder_group

 Ru(1)  Ru -0.0143(1)  -0.33147(5) -0.12268(3) 0.0537(3)   Uani 1.00 d ...

 Ru(2)  Ru -0.1213(1)  -0.24425(5) -0.08613(3) 0.0584(4)   Uani 1.00 d ...

 Cl(1)  Cl -0.3490(4)  -0.2838(2)  -0.0789(1)  0.088(1)    Uani 1.00 d ...

 S(1)   S  -0.1312(5)  -0.2574(2)  -0.1454(1)  0.071(1)    Uani 1.00 d ...

 S(2)   S  -0.0159(5)  -0.3206(1)  -0.06324(9) 0.0595(10)  Uani 1.00 d ...

 F(1)   F  -1.136(3)   -0.203(1)   -0.7406(8)  0.37(1)     Uiso 1.00 d ...

 F(2)   F  -0.955(3)   -0.255(1)   -0.7253(7)  0.38(1)     Uiso 1.00 d ...

 O(2)   O  -1.0000     -0.095(5)   -0.2500     1.24(7)     Uiso 1.00 d S..

 O(3)   O  0.3957      0.0799      0.1690      0.0815      Uiso 1.00 d ...

 C(1)   C  0.213(1)    -0.3570(6)  -0.1190(5)  0.061(4)    Uani 1.00 d ...

 C(2)   C  0.121(2)    -0.3993(7)  -0.1319(4)  0.071(4)    Uani 1.00 d ...

 C(3)   C  0.068(2)    -0.3841(9)  -0.1637(5)  0.092(6)    Uani 1.00 d ...

 C(4)   C  0.127(2)    -0.3333(9)  -0.1692(5)  0.098(6)    Uani 1.00 d ...

 C(5)   C  0.215(2)    -0.3153(7)  -0.1422(4)  0.072(5)    Uani 1.00 d ...

 C(6)   C  0.300(1)    -0.3621(6)  -0.0845(5)  0.081(5)    Uani 1.00 d ...

 C(7)   C  0.111(2)    -0.4554(7)  -0.1196(7)  0.123(8)    Uani 1.00 d ...

 C(8)   C  -0.022(2)   -0.4200(9)  -0.1873(5)  0.140(9)    Uani 1.00 d ...

 C(9)   C  0.098(2)    -0.2989(10) -0.2040(6)  0.145(9)    Uani 1.00 d ...

 C(10)  C  0.308(2)    -0.2672(8)  -0.1434(6)  0.114(8)    Uani 1.00 d ...

 C(11)  C  -0.081(2)   -0.1964(7)  -0.0397(5)  0.095(6)    Uani 1.00 d ...

 C(12)  C  -0.202(2)   -0.1733(8)  -0.0528(7)  0.108(7)    Uani 1.00 d ...

 C(13)  C  -0.164(2)   -0.1569(6)  -0.0856(6)  0.089(4)    Uani 1.00 d ...

 C(14)  C  -0.010(2)   -0.1657(5)  -0.0931(4)  0.066(4)    Uani 1.00 d ...

 C(15)  C  0.046(2)    -0.1917(6)  -0.0604(4)  0.066(4)    Uani 1.00 d ...

 C(16)  C  -0.060(2)   -0.2222(7)  -0.0023(4)  0.123(8)    Uani 1.00 d ...

 C(17)  C  -0.338(2)   -0.1603(8)  -0.0391(5)  0.123(8)    Uani 1.00 d ...

 C(18)  C  -0.247(2)   -0.1277(7)  -0.1169(8)  0.157(10)   Uani 1.00 d ...

 C(19)  C  0.079(2)    -0.1456(6)  -0.1233(5)  0.092(6)    Uani 1.00 d ...

 C(20)  C  0.192(2)    -0.2059(7)  -0.0547(5)  0.099(6)    Uani 1.00 d ...

 C(21)  C  -0.303(2)   -0.2753(7)  -0.1610(5)  0.094(6)    Uani 1.00 d ...

 C(22)  C  -0.132(2)   -0.3703(6)  -0.0412(3)  0.073(5)    Uani 1.00 d ...

 C(23)  C  -0.178(1)   -0.3759(5)  -0.1218(5)  0.064(5)    Uani 1.00 d ...

 C(24)  C  -0.270(1)   -0.4086(6)  -0.1238(4)  0.058(4)    Uani 1.00 d ...

 C(25)  C  -0.374(2)   -0.4522(5)  -0.1251(4)  0.059(4)    Uani 1.00 d ...

 C(26)  C  -0.470(2)   -0.4516(6)  -0.1561(4)  0.057(4)    Uani 1.00 d ...

 C(27)  C  -0.502(2)   -0.4060(6)  -0.1750(4)  0.064(4)    Uani 1.00 d ...

 C(28)  C  -0.576(2)   -0.4120(7)  -0.2041(5)  0.077(5)    Uani 1.00 d ...

 C(29)  C  -0.633(2)   -0.4587(8)  -0.2152(4)  0.086(6)    Uani 1.00 d ...

 C(30)  C  -0.721(2)   -0.4632(7)  -0.2476(6)  0.105(6)    Uani 1.00 d ...

 C(31)  C  -0.603(2)   -0.5082(8)  -0.1946(5)  0.096(7)    Uani 1.00 d ...

 C(32)  C  -0.523(2)   -0.5012(6)  -0.1650(4)  0.073(5)    Uani 1.00 d ...

 C(33)  C  -0.271(2)   -0.5024(6)  -0.0741(5)  0.072(6)    Uani 1.00 d ...

 C(34)  C  -0.392(2)   -0.4861(5)  -0.0951(4)  0.053(4)    Uani 1.00 d ...

 C(35)  C  -0.298(2)   -0.5323(7)  -0.0458(5)  0.076(6)    Uani 1.00 d ...

 C(36)  C  -0.529(2)   -0.5031(5)  -0.0853(4)  0.057(4)    Uani 1.00 d ...

 C(37)  C  -0.421(2)   -0.5471(6)  -0.0361(4)  0.068(5)    Uani 1.00 d ...

 C(38)  C  -0.540(2)   -0.5316(6)  -0.0547(4)  0.071(5)    Uani 1.00 d ...

 C(39)  C  -0.447(2)   -0.5804(7)  -0.0006(5)  0.100(7)    Uani 1.00 d ...

 C(42)  C  -1.070(9)   -0.158(3)   -0.251(3)   0.51(5)     Uiso 1.00 d ...

 C(43)  C  -1.06(2)    -0.170(4)   -0.225(3)   0.97(9)     Uiso 1.00 d ...

 C(44)  C  0.4025      0.1135      0.1744      0.0815      Uiso 1.00 d ...

 C(45)  C  0.4369      0.1411      0.1766      0.0815      Uiso 1.00 d ...

 B(1)   B  -1.0000     -0.194(8)   -0.7500     0.50(9)     Uiso 1.00 d S..


loop_

_atom_site_aniso_label

_atom_site_aniso_U_11

_atom_site_aniso_U_22

_atom_site_aniso_U_33

_atom_site_aniso_U_12

_atom_site_aniso_U_13

_atom_site_aniso_U_23

 Ru(1)  0.0438(7)   0.0668(7)   0.0504(6)   -0.0074(7)  -0.0032(7)  -0.0056(7)

 Ru(2)  0.0545(7)   0.0515(7)   0.0691(7)   -0.0080(7)  -0.0037(8)  -0.0017(7)

 Cl(1)  0.055(2)    0.080(3)    0.130(4)    -0.009(2)   0.013(3)    -0.012(3)

 S(1)   0.073(3)    0.068(2)    0.070(2)    -0.008(2)   -0.019(2)   0.006(2)

 S(2)   0.066(3)    0.061(2)    0.052(1)    -0.004(2)   -0.003(2)   0.001(2)

 C(1)   0.039(4)    0.077(10)   0.068(9)    -0.006(6)   0.012(7)    -0.004(7)

 C(2)   0.045(9)    0.082(7)    0.08(1)     -0.004(4)   0.018(8)    -0.020(8)

 C(3)   0.04(1)     0.16(2)     0.07(1)     0.011(9)    0.003(8)    -0.056(9)

 C(4)   0.06(1)     0.17(2)     0.069(8)    0.01(1)     0.015(5)    -0.02(1)

 C(5)   0.050(9)    0.09(1)     0.07(1)     0.006(8)    0.011(8)    0.009(8)

 C(6)   0.046(9)    0.09(1)     0.11(1)     0.006(9)    -0.026(9)   -0.01(1)

 C(7)   0.10(1)     0.059(8)    0.21(2)     -0.02(1)    0.03(2)     -0.05(1)

 C(8)   0.08(1)     0.19(2)     0.15(2)     -0.02(2)    -0.01(1)    -0.10(2)

 C(9)   0.10(2)     0.20(2)     0.13(2)     0.03(2)     0.06(2)     0.06(2)

 C(10)  0.06(1)     0.09(1)     0.20(2)     0.013(8)    0.03(1)     -0.01(1)

 C(11)  0.14(1)     0.08(1)     0.072(8)    -0.04(1)    0.040(10)   -0.023(6)

 C(12)  0.11(1)     0.05(1)     0.17(2)     -0.035(9)   0.06(1)     -0.05(1)

 C(13)  0.066(7)    0.053(3)    0.15(1)     -0.015(7)   -0.023(10)  -0.04(1)

 C(14)  0.078(8)    0.042(6)    0.079(8)    -0.003(6)   0.009(8)    -0.017(7)

 C(15)  0.091(8)    0.031(8)    0.075(9)    -0.026(6)   0.003(6)    -0.010(6)

 C(16)  0.20(2)     0.11(1)     0.063(9)    -0.05(2)    0.03(1)     -0.036(9)

 C(17)  0.12(1)     0.08(1)     0.16(2)     0.00(1)     0.07(1)     -0.02(1)

 C(18)  0.12(2)     0.05(1)     0.30(3)     0.00(1)     -0.13(2)    0.01(1)

 C(19)  0.13(2)     0.057(10)   0.09(1)     -0.005(10)  0.03(1)     0.017(10)

 C(20)  0.10(1)     0.10(1)     0.09(1)     -0.03(1)    -0.06(1)    -0.03(1)

 C(21)  0.095(10)   0.08(1)     0.11(1)     0.00(1)     -0.07(1)    -0.01(1)

 C(22)  0.10(1)     0.08(1)     0.038(8)    -0.026(9)   0.019(9)    -0.004(7)

 C(23)  0.049(7)    0.041(8)    0.10(1)     0.003(5)    -0.02(1)    -0.014(10)

 C(24)  0.046(8)    0.060(9)    0.067(9)    -0.002(5)   -0.003(9)   -0.011(9)

 C(25)  0.045(8)    0.062(8)    0.071(8)    -0.002(5)   0.007(8)    -0.012(7)

 C(26)  0.047(10)   0.057(6)    0.067(9)    0.004(7)    0.004(7)    -0.014(6)

 C(27)  0.050(9)    0.073(9)    0.068(9)    0.004(9)    0.008(8)    0.004(7)

 C(28)  0.05(1)     0.09(1)     0.09(1)     0.013(9)    -0.013(8)   0.020(10)

 C(29)  0.08(1)     0.13(1)     0.054(9)    -0.01(1)    -0.001(9)   -0.033(8)

 C(30)  0.07(1)     0.18(2)     0.060(9)    -0.01(1)    -0.009(10)  -0.02(2)

 C(31)  0.09(1)     0.13(1)     0.07(1)     -0.01(1)    -0.004(10)  -0.028(9)

 C(32)  0.07(1)     0.072(9)    0.080(10)   -0.026(9)   -0.007(9)   -0.009(8)

 C(33)  0.062(10)   0.06(1)     0.09(1)     0.012(9)    -0.013(9)   -0.011(8)

 C(34)  0.057(6)    0.036(7)    0.067(9)    -0.004(7)   -0.007(7)   -0.022(5)

 C(35)  0.078(9)    0.07(1)     0.08(1)     0.012(10)   -0.04(1)    -0.013(8)

 C(36)  0.063(8)    0.044(8)    0.064(8)    0.002(7)    0.006(10)   -0.008(6)

 C(37)  0.090(9)    0.047(10)   0.066(10)   0.003(8)    -0.013(8)   -0.018(7)

 C(38)  0.08(1)     0.06(1)     0.063(9)    -0.026(9)   -0.016(9)   0.000(7)

 C(39)  0.12(2)     0.09(1)     0.10(1)     0.00(1)     -0.03(1)    0.029(10)

#------------------------------------------------------------------------------

_refine_special_details

;

Refinement based on F against all reflections. The weighted R-factor (wR) and

goodness of fit (S) are based on F, conventional R-factors (R) are calculated

on F, with F set to zero for negative F. The threshold expression of

F^2^ > 2sigma(F^2^) is used only for calculating R-factors(gt) etc. thus the

refinement was done using all reflections.

;


_refine_ls_structure_factor_coef       F

_refine_ls_matrix_type                 full

_refine_ls_weighting_scheme            calc

_refine_ls_weighting_details

   'w = 1/[\s^2^(Fo) + 0.00022|Fo|^2^]'

_refine_ls_hydrogen_treatment          ?

_refine_ls_extinction_method           none

_refine_ls_extinction_coef             ?

_refine_ls_abs_structure_details       ?

_refine_ls_abs_structure_Flack         0.8(1)

_refine_ls_number_reflns               2560

_refine_ls_number_parameters           429

_refine_ls_number_restraints           0

_refine_ls_number_constraints          0

_refine_ls_R_factor_all                0.0694

_refine_ls_R_factor_gt                 0.0694

_refine_ls_wR_factor_all               ?

_refine_ls_wR_factor_ref               0.0865

_refine_ls_wR_factor_gt                0.0865

_refine_ls_goodness_of_fit_all         ?

_refine_ls_goodness_of_fit_ref         2.428

_refine_ls_shift/su_max                5.6450

_refine_ls_shift/su_mean               0.3820

_refine_diff_density_min               -0.50

_refine_diff_density_max               0.76

#------------------------------------------------------------------------------

_geom_special_details

;

 ?

;

loop_

_geom_bond_atom_site_label_1

_geom_bond_atom_site_label_2

_geom_bond_distance

_geom_bond_site_symmetry_1

_geom_bond_site_symmetry_2

_geom_bond_publ_flag

 Ru(1)     Ru(2)     2.768(3)   1_555 1_555 yes

 Ru(1)     S(1)      2.316(7)   1_555 1_555 yes

 Ru(1)     S(2)      2.303(6)   1_555 1_555 yes

 Ru(1)     C(1)      2.26(2)    1_555 1_555 yes

 Ru(1)     C(2)      2.15(3)    1_555 1_555 yes

 Ru(1)     C(3)      2.19(3)    1_555 1_555 yes

 Ru(1)     C(4)      2.24(3)    1_555 1_555 yes

 Ru(1)     C(5)      2.35(3)    1_555 1_555 yes

 Ru(1)     C(23)     1.91(2)    1_555 1_555 yes

 Ru(2)     Cl(1)     2.396(7)   1_555 1_555 yes

 Ru(2)     S(1)      2.307(7)   1_555 1_555 yes

 Ru(2)     S(2)      2.312(6)   1_555 1_555 yes

 Ru(2)     C(11)     2.18(3)    1_555 1_555 yes

 Ru(2)     C(12)     2.31(3)    1_555 1_555 yes

 Ru(2)     C(13)     2.20(3)    1_555 1_555 yes

 Ru(2)     C(14)     2.23(2)    1_555 1_555 yes

 Ru(2)     C(15)     2.28(2)    1_555 1_555 yes

 S(1)      C(21)     1.80(3)    1_555 1_555 yes

 S(2)      C(22)     1.86(2)    1_555 1_555 yes

 F(1)      B(1)      1.37(8)    1_555 1_555 yes

 F(2)      B(1)      1.8(2)     1_555 1_555 yes

 O(2)      C(42)     1.7(2)     1_555 1_555 yes

 O(2)      C(42)     1.7(2)     1_555 4_354 yes

 C(1)      C(2)      1.45(3)    1_555 1_555 yes

 C(1)      C(5)      1.36(3)    1_555 1_555 yes

 C(1)      C(6)      1.57(4)    1_555 1_555 yes

 C(2)      C(3)      1.37(4)    1_555 1_555 yes

 C(2)      C(7)      1.47(4)    1_555 1_555 yes

 C(3)      C(4)      1.39(4)    1_555 1_555 yes

 C(3)      C(8)      1.53(4)    1_555 1_555 yes

 C(4)      C(5)      1.41(4)    1_555 1_555 yes

 C(4)      C(9)      1.61(4)    1_555 1_555 yes

 C(5)      C(10)     1.48(4)    1_555 1_555 yes

 C(11)     C(12)     1.39(4)    1_555 1_555 yes

 C(11)     C(15)     1.45(4)    1_555 1_555 yes

 C(11)     C(16)     1.59(4)    1_555 1_555 yes

 C(12)     C(13)     1.38(4)    1_555 1_555 yes

 C(12)     C(17)     1.43(4)    1_555 1_555 yes

 C(13)     C(14)     1.51(3)    1_555 1_555 yes

 C(13)     C(18)     1.61(4)    1_555 1_555 yes

 C(14)     C(15)     1.51(3)    1_555 1_555 yes

 C(14)     C(19)     1.52(3)    1_555 1_555 yes

 C(15)     C(20)     1.45(4)    1_555 1_555 yes

 C(23)     C(24)     1.20(3)    1_555 1_555 yes

 C(24)     C(25)     1.47(3)    1_555 1_555 yes

 C(25)     C(26)     1.50(3)    1_555 1_555 yes

 C(25)     C(34)     1.44(3)    1_555 1_555 yes

 C(26)     C(27)     1.38(3)    1_555 1_555 yes

 C(26)     C(32)     1.37(3)    1_555 1_555 yes

 C(27)     C(28)     1.33(3)    1_555 1_555 yes

 C(28)     C(29)     1.34(4)    1_555 1_555 yes

 C(29)     C(30)     1.51(4)    1_555 1_555 yes

 C(29)     C(31)     1.49(4)    1_555 1_555 yes

 C(31)     C(32)     1.38(4)    1_555 1_555 yes

 C(33)     C(34)     1.46(3)    1_555 1_555 yes

 C(33)     C(35)     1.34(4)    1_555 1_555 yes

 C(34)     C(36)     1.42(3)    1_555 1_555 yes

 C(35)     C(37)     1.29(4)    1_555 1_555 yes

 C(36)     C(38)     1.38(3)    1_555 1_555 yes

 C(37)     C(38)     1.39(3)    1_555 1_555 yes

 C(37)     C(39)     1.62(3)    1_555 1_555 yes

 C(40)     C(41)     1.22(9)    1_555 1_555 yes

 C(40)     C(41)     1.22(9)    1_555 2_545 yes

 C(42)     C(42)     1.3(3)     1_555 4_354 yes

 C(42)     C(43)     1.1(2)     1_555 1_555 yes

 C(42)     C(43)     1.6(2)     1_555 4_354 yes

#------------------------------------------------------------------------------

loop_

_geom_angle_atom_site_label_1

_geom_angle_atom_site_label_2

_geom_angle_atom_site_label_3

_geom_angle

_geom_angle_site_symmetry_1

_geom_angle_site_symmetry_2

_geom_angle_site_symmetry_3

_geom_angle_publ_flag

   Ru(2)     Ru(1)     S(1)      53.1(2)    1_555 1_555 1_555 yes

   Ru(2)     Ru(1)     S(2)      53.3(2)    1_555 1_555 1_555 yes

   Ru(2)     Ru(1)     C(1)      122.6(7)   1_555 1_555 1_555 yes

   Ru(2)     Ru(1)     C(2)      156.1(8)   1_555 1_555 1_555 yes

   Ru(2)     Ru(1)     C(3)      163.8(10)  1_555 1_555 1_555 yes

   Ru(2)     Ru(1)     C(4)      130.0(10)  1_555 1_555 1_555 yes

   Ru(2)     Ru(1)     C(5)      111.9(7)   1_555 1_555 1_555 yes

   Ru(2)     Ru(1)     C(23)     97.9(7)    1_555 1_555 1_555 yes

   S(1)      Ru(1)     S(2)      106.3(3)   1_555 1_555 1_555 yes

   S(1)      Ru(1)     C(1)      134.8(7)   1_555 1_555 1_555 yes

   S(1)      Ru(1)     C(2)      147.6(8)   1_555 1_555 1_555 yes

   S(1)      Ru(1)     C(3)      111.7(9)   1_555 1_555 1_555 yes

   S(1)      Ru(1)     C(4)      90.1(9)    1_555 1_555 1_555 yes

   S(1)      Ru(1)     C(5)      101.1(7)   1_555 1_555 1_555 yes

   S(1)      Ru(1)     C(23)     94.0(7)    1_555 1_555 1_555 yes

   S(2)      Ru(1)     C(1)      88.7(7)    1_555 1_555 1_555 yes

   S(2)      Ru(1)     C(2)      105.1(8)   1_555 1_555 1_555 yes

   S(2)      Ru(1)     C(3)      141.9(9)   1_555 1_555 1_555 yes

   S(2)      Ru(1)     C(4)      143.2(8)   1_555 1_555 1_555 yes

   S(2)      Ru(1)     C(5)      107.7(7)   1_555 1_555 1_555 yes

   S(2)      Ru(1)     C(23)     92.5(10)   1_555 1_555 1_555 yes

   C(1)      Ru(1)     C(2)      38.3(9)    1_555 1_555 1_555 yes

   C(1)      Ru(1)     C(3)      62.3(10)   1_555 1_555 1_555 yes

   C(1)      Ru(1)     C(4)      57(1)      1_555 1_555 1_555 yes

   C(1)      Ru(1)     C(5)      34.3(8)    1_555 1_555 1_555 yes

   C(1)      Ru(1)     C(23)     128.4(9)   1_555 1_555 1_555 yes

   C(2)      Ru(1)     C(3)      36.9(10)   1_555 1_555 1_555 yes

   C(2)      Ru(1)     C(4)      59(1)      1_555 1_555 1_555 yes

   C(2)      Ru(1)     C(5)      61.2(10)   1_555 1_555 1_555 yes

   C(2)      Ru(1)     C(23)     92.6(10)   1_555 1_555 1_555 yes

   C(3)      Ru(1)     C(4)      36(1)      1_555 1_555 1_555 yes

   C(3)      Ru(1)     C(5)      62(1)      1_555 1_555 1_555 yes

   C(3)      Ru(1)     C(23)     87(1)      1_555 1_555 1_555 yes

   C(4)      Ru(1)     C(5)      35.7(9)    1_555 1_555 1_555 yes

   C(4)      Ru(1)     C(23)     119(1)     1_555 1_555 1_555 yes

   C(5)      Ru(1)     C(23)     149(1)     1_555 1_555 1_555 yes

   Ru(1)     Ru(2)     Cl(1)     94.3(2)    1_555 1_555 1_555 yes

   Ru(1)     Ru(2)     S(1)      53.4(2)    1_555 1_555 1_555 yes

   Ru(1)     Ru(2)     S(2)      53.0(2)    1_555 1_555 1_555 yes

   Ru(1)     Ru(2)     C(11)     140.7(10)  1_555 1_555 1_555 yes

   Ru(1)     Ru(2)     C(12)     176(1)     1_555 1_555 1_555 yes

   Ru(1)     Ru(2)     C(13)     146(1)     1_555 1_555 1_555 yes

   Ru(1)     Ru(2)     C(14)     116.2(6)   1_555 1_555 1_555 yes

   Ru(1)     Ru(2)     C(15)     113.9(7)   1_555 1_555 1_555 yes

   Cl(1)     Ru(2)     S(1)      91.2(3)    1_555 1_555 1_555 yes

   Cl(1)     Ru(2)     S(2)      90.9(3)    1_555 1_555 1_555 yes

   Cl(1)     Ru(2)     C(11)     106.7(9)   1_555 1_555 1_555 yes

   Cl(1)     Ru(2)     C(12)     86.7(8)    1_555 1_555 1_555 yes

   Cl(1)     Ru(2)     C(13)     103.3(7)   1_555 1_555 1_555 yes

   Cl(1)     Ru(2)     C(14)     143.1(7)   1_555 1_555 1_555 yes

   Cl(1)     Ru(2)     C(15)     144.6(7)   1_555 1_555 1_555 yes

   S(1)      Ru(2)     S(2)      106.2(2)   1_555 1_555 1_555 yes

   S(1)      Ru(2)     C(11)     153.6(8)   1_555 1_555 1_555 yes

   S(1)      Ru(2)     C(12)     130(1)     1_555 1_555 1_555 yes

   S(1)      Ru(2)     C(13)     98.0(10)   1_555 1_555 1_555 yes

   S(1)      Ru(2)     C(14)     91.3(6)    1_555 1_555 1_555 yes

   S(1)      Ru(2)     C(15)     122.5(7)   1_555 1_555 1_555 yes

   S(2)      Ru(2)     C(11)     93.1(9)    1_555 1_555 1_555 yes

   S(2)      Ru(2)     C(12)     123(1)     1_555 1_555 1_555 yes

   S(2)      Ru(2)     C(13)     151.6(8)   1_555 1_555 1_555 yes

   S(2)      Ru(2)     C(14)     123.4(7)   1_555 1_555 1_555 yes

   S(2)      Ru(2)     C(15)     89.8(7)    1_555 1_555 1_555 yes

   C(11)     Ru(2)     C(12)     35(1)      1_555 1_555 1_555 yes

   C(11)     Ru(2)     C(13)     59(1)      1_555 1_555 1_555 yes

   C(11)     Ru(2)     C(14)     62.7(10)   1_555 1_555 1_555 yes

   C(11)     Ru(2)     C(15)     38.0(9)    1_555 1_555 1_555 yes

   C(12)     Ru(2)     C(13)     35(1)      1_555 1_555 1_555 yes

   C(12)     Ru(2)     C(14)     64.1(9)    1_555 1_555 1_555 yes

   C(12)     Ru(2)     C(15)     63(1)      1_555 1_555 1_555 yes

   C(13)     Ru(2)     C(14)     40.0(9)    1_555 1_555 1_555 yes

   C(13)     Ru(2)     C(15)     64.4(9)    1_555 1_555 1_555 yes

   C(14)     Ru(2)     C(15)     39.1(8)    1_555 1_555 1_555 yes

   Ru(1)     S(1)      Ru(2)     73.6(2)    1_555 1_555 1_555 yes

   Ru(1)     S(1)      C(21)     111.7(9)   1_555 1_555 1_555 yes

   Ru(2)     S(1)      C(21)     113(1)     1_555 1_555 1_555 yes

   Ru(1)     S(2)      Ru(2)     73.7(2)    1_555 1_555 1_555 yes

   Ru(1)     S(2)      C(22)     112.4(7)   1_555 1_555 1_555 yes

   Ru(2)     S(2)      C(22)     117.1(10)  1_555 1_555 1_555 yes

   C(42)     O(2)      C(42)     46(10)     1_555 1_555 4_354 yes

   Ru(1)     C(1)      C(2)      66(1)      1_555 1_555 1_555 yes

   Ru(1)     C(1)      C(5)      76(1)      1_555 1_555 1_555 yes

   Ru(1)     C(1)      C(6)      125(1)     1_555 1_555 1_555 yes

   C(2)      C(1)      C(5)      109(2)     1_555 1_555 1_555 yes

   C(2)      C(1)      C(6)      123(2)     1_555 1_555 1_555 yes

   C(5)      C(1)      C(6)      127(2)     1_555 1_555 1_555 yes

   Ru(1)     C(2)      C(1)      75(1)      1_555 1_555 1_555 yes

   Ru(1)     C(2)      C(3)      73(1)      1_555 1_555 1_555 yes

   Ru(1)     C(2)      C(7)      129(2)     1_555 1_555 1_555 yes

   C(1)      C(2)      C(3)      109(2)     1_555 1_555 1_555 yes

   C(1)      C(2)      C(7)      127(2)     1_555 1_555 1_555 yes

   C(3)      C(2)      C(7)      121(3)     1_555 1_555 1_555 yes

   Ru(1)     C(3)      C(2)      69(1)      1_555 1_555 1_555 yes

   Ru(1)     C(3)      C(4)      73(1)      1_555 1_555 1_555 yes

   Ru(1)     C(3)      C(8)      124(1)     1_555 1_555 1_555 yes

   C(2)      C(3)      C(4)      103(2)     1_555 1_555 1_555 yes

   C(2)      C(3)      C(8)      124(3)     1_555 1_555 1_555 yes

   C(4)      C(3)      C(8)      131(3)     1_555 1_555 1_555 yes

   Ru(1)     C(4)      C(3)      69(1)      1_555 1_555 1_555 yes

   Ru(1)     C(4)      C(5)      76(1)      1_555 1_555 1_555 yes

   Ru(1)     C(4)      C(9)      123(2)     1_555 1_555 1_555 yes

   C(3)      C(4)      C(5)      114(3)     1_555 1_555 1_555 yes

   C(3)      C(4)      C(9)      122(3)     1_555 1_555 1_555 yes

   C(5)      C(4)      C(9)      123(3)     1_555 1_555 1_555 yes

   Ru(1)     C(5)      C(1)      69(1)      1_555 1_555 1_555 yes

   Ru(1)     C(5)      C(4)      67(1)      1_555 1_555 1_555 yes

   Ru(1)     C(5)      C(10)     134(1)     1_555 1_555 1_555 yes

   C(1)      C(5)      C(4)      103(2)     1_555 1_555 1_555 yes

   C(1)      C(5)      C(10)     129(2)     1_555 1_555 1_555 yes

   C(4)      C(5)      C(10)     126(3)     1_555 1_555 1_555 yes

   Ru(2)     C(11)     C(12)     77(2)      1_555 1_555 1_555 yes

   Ru(2)     C(11)     C(15)     74(1)      1_555 1_555 1_555 yes

   Ru(2)     C(11)     C(16)     123(1)     1_555 1_555 1_555 yes

   C(12)     C(11)     C(15)     117(2)     1_555 1_555 1_555 yes

   C(12)     C(11)     C(16)     126(3)     1_555 1_555 1_555 yes

   C(15)     C(11)     C(16)     115(3)     1_555 1_555 1_555 yes

   Ru(2)     C(12)     C(11)     66(1)      1_555 1_555 1_555 yes

   Ru(2)     C(12)     C(13)     67(1)      1_555 1_555 1_555 yes

   Ru(2)     C(12)     C(17)     132(2)     1_555 1_555 1_555 yes

   C(11)     C(12)     C(13)     103(2)     1_555 1_555 1_555 yes

   C(11)     C(12)     C(17)     135(3)     1_555 1_555 1_555 yes

   C(13)     C(12)     C(17)     120(3)     1_555 1_555 1_555 yes

   Ru(2)     C(13)     C(12)     76(1)      1_555 1_555 1_555 yes

   Ru(2)     C(13)     C(14)     71(1)      1_555 1_555 1_555 yes

   Ru(2)     C(13)     C(18)     121(1)     1_555 1_555 1_555 yes

   C(12)     C(13)     C(14)     112(2)     1_555 1_555 1_555 yes

   C(12)     C(13)     C(18)     133(3)     1_555 1_555 1_555 yes

   C(14)     C(13)     C(18)     113(3)     1_555 1_555 1_555 yes

   Ru(2)     C(14)     C(13)     68(1)      1_555 1_555 1_555 yes

   Ru(2)     C(14)     C(15)     72(1)      1_555 1_555 1_555 yes

   Ru(2)     C(14)     C(19)     129(1)     1_555 1_555 1_555 yes

   C(13)     C(14)     C(15)     104(2)     1_555 1_555 1_555 yes

   C(13)     C(14)     C(19)     129(2)     1_555 1_555 1_555 yes

   C(15)     C(14)     C(19)     125(2)     1_555 1_555 1_555 yes

   Ru(2)     C(15)     C(11)     67(1)      1_555 1_555 1_555 yes

   Ru(2)     C(15)     C(14)     68(1)      1_555 1_555 1_555 yes

   Ru(2)     C(15)     C(20)     126(1)     1_555 1_555 1_555 yes

   C(11)     C(15)     C(14)     101(2)     1_555 1_555 1_555 yes

   C(11)     C(15)     C(20)     134(2)     1_555 1_555 1_555 yes

   C(14)     C(15)     C(20)     124(2)     1_555 1_555 1_555 yes

   Ru(1)     C(23)     C(24)     171(2)     1_555 1_555 1_555 yes

   C(23)     C(24)     C(25)     174(2)     1_555 1_555 1_555 yes

   C(24)     C(25)     C(26)     115(2)     1_555 1_555 1_555 yes

   C(24)     C(25)     C(34)     118(2)     1_555 1_555 1_555 yes

   C(26)     C(25)     C(34)     124(2)     1_555 1_555 1_555 yes

   C(25)     C(26)     C(27)     124(2)     1_555 1_555 1_555 yes

   C(25)     C(26)     C(32)     114(2)     1_555 1_555 1_555 yes

   C(27)     C(26)     C(32)     121(2)     1_555 1_555 1_555 yes

   C(26)     C(27)     C(28)     118(2)     1_555 1_555 1_555 yes

   C(27)     C(28)     C(29)     125(2)     1_555 1_555 1_555 yes

   C(28)     C(29)     C(30)     123(3)     1_555 1_555 1_555 yes

   C(28)     C(29)     C(31)     117(2)     1_555 1_555 1_555 yes

   C(30)     C(29)     C(31)     119(2)     1_555 1_555 1_555 yes

   C(29)     C(31)     C(32)     116(2)     1_555 1_555 1_555 yes

   C(26)     C(32)     C(31)     121(2)     1_555 1_555 1_555 yes

   C(34)     C(33)     C(35)     116(2)     1_555 1_555 1_555 yes

   C(25)     C(34)     C(33)     120(2)     1_555 1_555 1_555 yes

   C(25)     C(34)     C(36)     119(2)     1_555 1_555 1_555 yes

   C(33)     C(34)     C(36)     119(2)     1_555 1_555 1_555 yes

   C(33)     C(35)     C(37)     124(2)     1_555 1_555 1_555 yes

   C(34)     C(36)     C(38)     116(2)     1_555 1_555 1_555 yes

   C(35)     C(37)     C(38)     120(2)     1_555 1_555 1_555 yes

   C(35)     C(37)     C(39)     121(2)     1_555 1_555 1_555 yes

   C(38)     C(37)     C(39)     116(2)     1_555 1_555 1_555 yes

   C(36)     C(38)     C(37)     121(2)     1_555 1_555 1_555 yes

   C(41)     C(40)     C(41)     113(12)    1_555 1_555 2_545 yes

   O(2)      C(42)     C(42)     66(5)      1_555 1_555 4_354 yes

   O(2)      C(42)     C(43)     100(13)    1_555 1_555 1_555 yes

   O(2)      C(42)     C(43)     82(9)      1_555 1_555 4_354 yes

   C(42)     C(42)     C(43)     80(16)     4_354 1_555 1_555 yes

   C(42)     C(42)     C(43)     42(8)      4_354 1_555 4_354 yes

   C(43)     C(42)     C(43)     115(17)    1_555 1_555 4_354 yes

   C(42)     C(43)     C(42)     57(16)     1_555 1_555 4_354 yes

   F(1)      B(1)      F(1)      162(29)    1_555 1_555 4_353 yes

   F(1)      B(1)      F(2)      87(13)     1_555 1_555 1_555 yes

   F(1)      B(1)      F(2)      77(11)     1_555 1_555 4_353 yes

   F(1)      B(1)      F(2)      77(11)     4_353 1_555 1_555 yes

   F(1)      B(1)      F(2)      87(13)     4_353 1_555 4_353 yes

   F(2)      B(1)      F(2)      69(12)     1_555 1_555 4_353 yes

#------------------------------------------------------------------------------

loop_

_geom_torsion_atom_site_label_1

_geom_torsion_atom_site_label_2

_geom_torsion_atom_site_label_3

_geom_torsion_atom_site_label_4

_geom_torsion

_geom_torsion_site_symmetry_1

_geom_torsion_site_symmetry_2

_geom_torsion_site_symmetry_3

_geom_torsion_site_symmetry_4

_geom_torsion_publ_flag

   Ru(1)   Ru(2)   S(1)    C(21)   106(1)   1_555 1_555 1_555 1_555 yes

   Ru(1)   Ru(2)   S(2)    C(22)   -107.3(8) 1_555 1_555 1_555 1_555 yes

   Ru(1)   Ru(2)   C(11)   C(12)   -178(1)  1_555 1_555 1_555 1_555 yes

   Ru(1)   Ru(2)   C(11)   C(15)   58(2)    1_555 1_555 1_555 1_555 yes

   Ru(1)   Ru(2)   C(11)   C(16)   -52(3)   1_555 1_555 1_555 1_555 yes

   Ru(1)   Ru(2)   C(12)   C(11)   17(13)   1_555 1_555 1_555 1_555 yes

   Ru(1)   Ru(2)   C(12)   C(13)   134(11)  1_555 1_555 1_555 1_555 yes

   Ru(1)   Ru(2)   C(12)   C(17)   -113(11) 1_555 1_555 1_555 1_555 yes

   Ru(1)   Ru(2)   C(13)   C(12)   -175(1)  1_555 1_555 1_555 1_555 yes

   Ru(1)   Ru(2)   C(13)   C(14)   -55(2)   1_555 1_555 1_555 1_555 yes

   Ru(1)   Ru(2)   C(13)   C(18)   51(3)    1_555 1_555 1_555 1_555 yes

   Ru(1)   Ru(2)   C(14)   C(13)   150(1)   1_555 1_555 1_555 1_555 yes

   Ru(1)   Ru(2)   C(14)   C(15)   -96(1)   1_555 1_555 1_555 1_555 yes

   Ru(1)   Ru(2)   C(14)   C(19)   25(2)    1_555 1_555 1_555 1_555 yes

   Ru(1)   Ru(2)   C(15)   C(11)   -143(1)  1_555 1_555 1_555 1_555 yes

   Ru(1)   Ru(2)   C(15)   C(14)   102(1)   1_555 1_555 1_555 1_555 yes

   Ru(1)   Ru(2)   C(15)   C(20)   -15(2)   1_555 1_555 1_555 1_555 yes

   Ru(1)   S(1)    Ru(2)   Cl(1)   -94.5(2) 1_555 1_555 1_555 1_555 yes

   Ru(1)   S(1)    Ru(2)   S(2)    -3.2(3)  1_555 1_555 1_555 1_555 yes

   Ru(1)   S(1)    Ru(2)   C(11)   132(2)   1_555 1_555 1_555 1_555 yes

   Ru(1)   S(1)    Ru(2)   C(12)   178.8(10) 1_555 1_555 1_555 1_555 yes

   Ru(1)   S(1)    Ru(2)   C(13)   161.9(7) 1_555 1_555 1_555 1_555 yes

   Ru(1)   S(1)    Ru(2)   C(14)   122.3(7) 1_555 1_555 1_555 1_555 yes

   Ru(1)   S(1)    Ru(2)   C(15)   97.2(8)  1_555 1_555 1_555 1_555 yes

   Ru(1)   S(2)    Ru(2)   Cl(1)   94.7(2)  1_555 1_555 1_555 1_555 yes

   Ru(1)   S(2)    Ru(2)   S(1)    3.2(3)   1_555 1_555 1_555 1_555 yes

   Ru(1)   S(2)    Ru(2)   C(11)   -158.6(9) 1_555 1_555 1_555 1_555 yes

   Ru(1)   S(2)    Ru(2)   C(12)   -178.6(9) 1_555 1_555 1_555 1_555 yes

   Ru(1)   S(2)    Ru(2)   C(13)   -144(1)  1_555 1_555 1_555 1_555 yes

   Ru(1)   S(2)    Ru(2)   C(14)   -99.6(7) 1_555 1_555 1_555 1_555 yes

   Ru(1)   S(2)    Ru(2)   C(15)   -120.7(7) 1_555 1_555 1_555 1_555 yes

   Ru(1)   C(1)    C(2)    C(3)    65(1)    1_555 1_555 1_555 1_555 yes

   Ru(1)   C(1)    C(2)    C(7)    -129(3)  1_555 1_555 1_555 1_555 yes

   Ru(1)   C(1)    C(5)    C(4)    -59(1)   1_555 1_555 1_555 1_555 yes

   Ru(1)   C(1)    C(5)    C(10)   131(2)   1_555 1_555 1_555 1_555 yes

   Ru(1)   C(2)    C(1)    C(5)    -64(1)   1_555 1_555 1_555 1_555 yes

   Ru(1)   C(2)    C(1)    C(6)    118(2)   1_555 1_555 1_555 1_555 yes

   Ru(1)   C(2)    C(3)    C(4)    66(1)    1_555 1_555 1_555 1_555 yes

   Ru(1)   C(2)    C(3)    C(8)    -118(2)  1_555 1_555 1_555 1_555 yes

   Ru(1)   C(3)    C(2)    C(1)    -67(1)   1_555 1_555 1_555 1_555 yes

   Ru(1)   C(3)    C(2)    C(7)    126(2)   1_555 1_555 1_555 1_555 yes

   Ru(1)   C(3)    C(4)    C(5)    63(2)    1_555 1_555 1_555 1_555 yes

   Ru(1)   C(3)    C(4)    C(9)    -117(2)  1_555 1_555 1_555 1_555 yes

   Ru(1)   C(4)    C(3)    C(2)    -63(1)   1_555 1_555 1_555 1_555 yes

   Ru(1)   C(4)    C(3)    C(8)    122(3)   1_555 1_555 1_555 1_555 yes

   Ru(1)   C(4)    C(5)    C(1)    60(1)    1_555 1_555 1_555 1_555 yes

   Ru(1)   C(4)    C(5)    C(10)   -130(2)  1_555 1_555 1_555 1_555 yes

   Ru(1)   C(5)    C(1)    C(2)    58(1)    1_555 1_555 1_555 1_555 yes

   Ru(1)   C(5)    C(1)    C(6)    -124(2)  1_555 1_555 1_555 1_555 yes

   Ru(1)   C(5)    C(4)    C(3)    -60(2)   1_555 1_555 1_555 1_555 yes

   Ru(1)   C(5)    C(4)    C(9)    121(2)   1_555 1_555 1_555 1_555 yes

   Ru(1)   C(23)   C(24)   C(25)   52(47)   1_555 1_555 1_555 1_555 yes

   Ru(2)   Ru(1)   S(1)    C(21)   -109(1)  1_555 1_555 1_555 1_555 yes

   Ru(2)   Ru(1)   S(2)    C(22)   113(1)   1_555 1_555 1_555 1_555 yes

   Ru(2)   Ru(1)   C(1)    C(2)    160(1)   1_555 1_555 1_555 1_555 yes

   Ru(2)   Ru(1)   C(1)    C(5)    -81(1)   1_555 1_555 1_555 1_555 yes

   Ru(2)   Ru(1)   C(1)    C(6)    44(2)    1_555 1_555 1_555 1_555 yes

   Ru(2)   Ru(1)   C(2)    C(1)    -44(2)   1_555 1_555 1_555 1_555 yes

   Ru(2)   Ru(1)   C(2)    C(3)    -160(1)  1_555 1_555 1_555 1_555 yes

   Ru(2)   Ru(1)   C(2)    C(7)    82(3)    1_555 1_555 1_555 1_555 yes

   Ru(2)   Ru(1)   C(3)    C(2)    151(2)   1_555 1_555 1_555 1_555 yes

   Ru(2)   Ru(1)   C(3)    C(4)    39(3)    1_555 1_555 1_555 1_555 yes

   Ru(2)   Ru(1)   C(3)    C(8)    -89(4)   1_555 1_555 1_555 1_555 yes

   Ru(2)   Ru(1)   C(4)    C(3)    -166(1)  1_555 1_555 1_555 1_555 yes

   Ru(2)   Ru(1)   C(4)    C(5)    70(2)    1_555 1_555 1_555 1_555 yes

   Ru(2)   Ru(1)   C(4)    C(9)    -50(3)   1_555 1_555 1_555 1_555 yes

   Ru(2)   Ru(1)   C(5)    C(1)    116(1)   1_555 1_555 1_555 1_555 yes

   Ru(2)   Ru(1)   C(5)    C(4)    -128(1)  1_555 1_555 1_555 1_555 yes

   Ru(2)   Ru(1)   C(5)    C(10)   -9(3)    1_555 1_555 1_555 1_555 yes

   Ru(2)   Ru(1)   C(23)   C(24)   178(17)  1_555 1_555 1_555 1_555 yes

   Ru(2)   S(1)    Ru(1)   S(2)    3.2(3)   1_555 1_555 1_555 1_555 yes

   Ru(2)   S(1)    Ru(1)   C(1)    -101(1)  1_555 1_555 1_555 1_555 yes

   Ru(2)   S(1)    Ru(1)   C(2)    -161(1)  1_555 1_555 1_555 1_555 yes

   Ru(2)   S(1)    Ru(1)   C(3)    -173.6(9) 1_555 1_555 1_555 1_555 yes

   Ru(2)   S(1)    Ru(1)   C(4)    -143.4(9) 1_555 1_555 1_555 1_555 yes

   Ru(2)   S(1)    Ru(1)   C(5)    -109.2(7) 1_555 1_555 1_555 1_555 yes

   Ru(2)   S(1)    Ru(1)   C(23)   97.0(9)  1_555 1_555 1_555 1_555 yes

   Ru(2)   S(2)    Ru(1)   S(1)    -3.2(3)  1_555 1_555 1_555 1_555 yes

   Ru(2)   S(2)    Ru(1)   C(1)    133.5(6) 1_555 1_555 1_555 1_555 yes

   Ru(2)   S(2)    Ru(1)   C(2)    168.6(7) 1_555 1_555 1_555 1_555 yes

   Ru(2)   S(2)    Ru(1)   C(3)    172(1)   1_555 1_555 1_555 1_555 yes

   Ru(2)   S(2)    Ru(1)   C(4)    110(1)   1_555 1_555 1_555 1_555 yes

   Ru(2)   S(2)    Ru(1)   C(5)    104.5(7) 1_555 1_555 1_555 1_555 yes

   Ru(2)   S(2)    Ru(1)   C(23)   -98.0(7) 1_555 1_555 1_555 1_555 yes

   Ru(2)   C(11)   C(12)   C(13)   -58(2)   1_555 1_555 1_555 1_555 yes

   Ru(2)   C(11)   C(12)   C(17)   127(3)   1_555 1_555 1_555 1_555 yes

   Ru(2)   C(11)   C(15)   C(14)   60(1)    1_555 1_555 1_555 1_555 yes

   Ru(2)   C(11)   C(15)   C(20)   -119(3)  1_555 1_555 1_555 1_555 yes

   Ru(2)   C(12)   C(11)   C(15)   65(2)    1_555 1_555 1_555 1_555 yes

   Ru(2)   C(12)   C(11)   C(16)   -122(2)  1_555 1_555 1_555 1_555 yes

   Ru(2)   C(12)   C(13)   C(14)   -62(1)   1_555 1_555 1_555 1_555 yes

   Ru(2)   C(12)   C(13)   C(18)   121(3)   1_555 1_555 1_555 1_555 yes

   Ru(2)   C(13)   C(12)   C(11)   57(2)    1_555 1_555 1_555 1_555 yes

   Ru(2)   C(13)   C(12)   C(17)   -127(2)  1_555 1_555 1_555 1_555 yes

   Ru(2)   C(13)   C(14)   C(15)   -64(1)   1_555 1_555 1_555 1_555 yes

   Ru(2)   C(13)   C(14)   C(19)   124(2)   1_555 1_555 1_555 1_555 yes

   Ru(2)   C(14)   C(13)   C(12)   65(2)    1_555 1_555 1_555 1_555 yes

   Ru(2)   C(14)   C(13)   C(18)   -117(2)  1_555 1_555 1_555 1_555 yes

   Ru(2)   C(14)   C(15)   C(11)   -59(1)   1_555 1_555 1_555 1_555 yes

   Ru(2)   C(14)   C(15)   C(20)   120(2)   1_555 1_555 1_555 1_555 yes

   Ru(2)   C(15)   C(11)   C(12)   -66(2)   1_555 1_555 1_555 1_555 yes

   Ru(2)   C(15)   C(11)   C(16)   120(2)   1_555 1_555 1_555 1_555 yes

   Ru(2)   C(15)   C(14)   C(13)   61(1)    1_555 1_555 1_555 1_555 yes

   Ru(2)   C(15)   C(14)   C(19)   -126(2)  1_555 1_555 1_555 1_555 yes

   Cl(1)   Ru(2)   Ru(1)   S(1)    88.3(3)  1_555 1_555 1_555 1_555 yes

   Cl(1)   Ru(2)   Ru(1)   S(2)    -87.9(3) 1_555 1_555 1_555 1_555 yes

   Cl(1)   Ru(2)   Ru(1)   C(1)    -147.2(9) 1_555 1_555 1_555 1_555 yes

   Cl(1)   Ru(2)   Ru(1)   C(2)    -116(1)  1_555 1_555 1_555 1_555 yes

   Cl(1)   Ru(2)   Ru(1)   C(3)    109(2)   1_555 1_555 1_555 1_555 yes

   Cl(1)   Ru(2)   Ru(1)   C(4)    139(1)   1_555 1_555 1_555 1_555 yes

   Cl(1)   Ru(2)   Ru(1)   C(5)    175.8(7) 1_555 1_555 1_555 1_555 yes

   Cl(1)   Ru(2)   Ru(1)   C(23)   -0.7(9)  1_555 1_555 1_555 1_555 yes

   Cl(1)   Ru(2)   S(1)    C(21)   12(1)    1_555 1_555 1_555 1_555 yes

   Cl(1)   Ru(2)   S(2)    C(22)   -12.6(8) 1_555 1_555 1_555 1_555 yes

   Cl(1)   Ru(2)   C(11)   C(12)   -58(1)   1_555 1_555 1_555 1_555 yes

   Cl(1)   Ru(2)   C(11)   C(15)   177(1)   1_555 1_555 1_555 1_555 yes

   Cl(1)   Ru(2)   C(11)   C(16)   66(2)    1_555 1_555 1_555 1_555 yes

   Cl(1)   Ru(2)   C(12)   C(11)   124(1)   1_555 1_555 1_555 1_555 yes

   Cl(1)   Ru(2)   C(12)   C(13)   -118(1)  1_555 1_555 1_555 1_555 yes

   Cl(1)   Ru(2)   C(12)   C(17)   -6(4)    1_555 1_555 1_555 1_555 yes

   Cl(1)   Ru(2)   C(13)   C(12)   64(1)    1_555 1_555 1_555 1_555 yes

   Cl(1)   Ru(2)   C(13)   C(14)   -175(1)  1_555 1_555 1_555 1_555 yes

   Cl(1)   Ru(2)   C(13)   C(18)   -69(2)   1_555 1_555 1_555 1_555 yes

   Cl(1)   Ru(2)   C(14)   C(13)   7(2)     1_555 1_555 1_555 1_555 yes

   Cl(1)   Ru(2)   C(14)   C(15)   120(1)   1_555 1_555 1_555 1_555 yes

   Cl(1)   Ru(2)   C(14)   C(19)   -117(2)  1_555 1_555 1_555 1_555 yes

   Cl(1)   Ru(2)   C(15)   C(11)   -3(2)    1_555 1_555 1_555 1_555 yes

   Cl(1)   Ru(2)   C(15)   C(14)   -117(1)  1_555 1_555 1_555 1_555 yes

   Cl(1)   Ru(2)   C(15)   C(20)   124(2)   1_555 1_555 1_555 1_555 yes

   S(1)    Ru(1)   Ru(2)   S(2)    176.2(3) 1_555 1_555 1_555 1_555 yes

   S(1)    Ru(1)   Ru(2)   C(11)   -148(1)  1_555 1_555 1_555 1_555 yes

   S(1)    Ru(1)   Ru(2)   C(12)   -164(11) 1_555 1_555 1_555 1_555 yes

   S(1)    Ru(1)   Ru(2)   C(13)   -34(1)   1_555 1_555 1_555 1_555 yes

   S(1)    Ru(1)   Ru(2)   C(14)   -70.4(8) 1_555 1_555 1_555 1_555 yes

   S(1)    Ru(1)   Ru(2)   C(15)   -113.7(8) 1_555 1_555 1_555 1_555 yes

   S(1)    Ru(1)   S(2)    C(22)   109(1)   1_555 1_555 1_555 1_555 yes

   S(1)    Ru(1)   C(1)    C(2)    -131(1)  1_555 1_555 1_555 1_555 yes

   S(1)    Ru(1)   C(1)    C(5)    -13(2)   1_555 1_555 1_555 1_555 yes

   S(1)    Ru(1)   C(1)    C(6)    113(1)   1_555 1_555 1_555 1_555 yes

   S(1)    Ru(1)   C(2)    C(1)    97(1)    1_555 1_555 1_555 1_555 yes

   S(1)    Ru(1)   C(2)    C(3)    -18(2)   1_555 1_555 1_555 1_555 yes

   S(1)    Ru(1)   C(2)    C(7)    -135(2)  1_555 1_555 1_555 1_555 yes

   S(1)    Ru(1)   C(3)    C(2)    169(1)   1_555 1_555 1_555 1_555 yes

   S(1)    Ru(1)   C(3)    C(4)    57(1)    1_555 1_555 1_555 1_555 yes

   S(1)    Ru(1)   C(3)    C(8)    -71(3)   1_555 1_555 1_555 1_555 yes

   S(1)    Ru(1)   C(4)    C(3)    -128(1)  1_555 1_555 1_555 1_555 yes

   S(1)    Ru(1)   C(4)    C(5)    109(1)   1_555 1_555 1_555 1_555 yes

   S(1)    Ru(1)   C(4)    C(9)    -11(2)   1_555 1_555 1_555 1_555 yes

   S(1)    Ru(1)   C(5)    C(1)    170(1)   1_555 1_555 1_555 1_555 yes

   S(1)    Ru(1)   C(5)    C(4)    -74(2)   1_555 1_555 1_555 1_555 yes

   S(1)    Ru(1)   C(5)    C(10)   45(3)    1_555 1_555 1_555 1_555 yes

   S(1)    Ru(1)   C(23)   C(24)   125(17)  1_555 1_555 1_555 1_555 yes

   S(1)    Ru(2)   Ru(1)   S(2)    -176.2(3) 1_555 1_555 1_555 1_555 yes

   S(1)    Ru(2)   Ru(1)   C(1)    124.5(9) 1_555 1_555 1_555 1_555 yes

   S(1)    Ru(2)   Ru(1)   C(2)    155(1)   1_555 1_555 1_555 1_555 yes

   S(1)    Ru(2)   Ru(1)   C(3)    21(2)    1_555 1_555 1_555 1_555 yes

   S(1)    Ru(2)   Ru(1)   C(4)    51(1)    1_555 1_555 1_555 1_555 yes

   S(1)    Ru(2)   Ru(1)   C(5)    87.6(8)  1_555 1_555 1_555 1_555 yes

   S(1)    Ru(2)   Ru(1)   C(23)   -89.0(9) 1_555 1_555 1_555 1_555 yes

   S(1)    Ru(2)   S(2)    C(22)   -104.1(8) 1_555 1_555 1_555 1_555 yes

   S(1)    Ru(2)   C(11)   C(12)   71(3)    1_555 1_555 1_555 1_555 yes

   S(1)    Ru(2)   C(11)   C(15)   -51(3)   1_555 1_555 1_555 1_555 yes

   S(1)    Ru(2)   C(11)   C(16)   -162(1)  1_555 1_555 1_555 1_555 yes

   S(1)    Ru(2)   C(12)   C(11)   -146(1)  1_555 1_555 1_555 1_555 yes

   S(1)    Ru(2)   C(12)   C(13)   -29(2)   1_555 1_555 1_555 1_555 yes

   S(1)    Ru(2)   C(12)   C(17)   82(4)    1_555 1_555 1_555 1_555 yes

   S(1)    Ru(2)   C(13)   C(12)   157(1)   1_555 1_555 1_555 1_555 yes

   S(1)    Ru(2)   C(13)   C(14)   -82(1)   1_555 1_555 1_555 1_555 yes

   S(1)    Ru(2)   C(13)   C(18)   23(2)    1_555 1_555 1_555 1_555 yes

   S(1)    Ru(2)   C(14)   C(13)   100(1)   1_555 1_555 1_555 1_555 yes

   S(1)    Ru(2)   C(14)   C(15)   -145(1)  1_555 1_555 1_555 1_555 yes

   S(1)    Ru(2)   C(14)   C(19)   -24(2)   1_555 1_555 1_555 1_555 yes

   S(1)    Ru(2)   C(15)   C(11)   155(1)   1_555 1_555 1_555 1_555 yes

   S(1)    Ru(2)   C(15)   C(14)   42(1)    1_555 1_555 1_555 1_555 yes

   S(1)    Ru(2)   C(15)   C(20)   -75(2)   1_555 1_555 1_555 1_555 yes

   S(2)    Ru(1)   Ru(2)   C(11)   35(1)    1_555 1_555 1_555 1_555 yes

   S(2)    Ru(1)   Ru(2)   C(12)   18(11)   1_555 1_555 1_555 1_555 yes

   S(2)    Ru(1)   Ru(2)   C(13)   149(1)   1_555 1_555 1_555 1_555 yes

   S(2)    Ru(1)   Ru(2)   C(14)   113.4(8) 1_555 1_555 1_555 1_555 yes

   S(2)    Ru(1)   Ru(2)   C(15)   70.1(8)  1_555 1_555 1_555 1_555 yes

   S(2)    Ru(1)   S(1)    C(21)   -106(1)  1_555 1_555 1_555 1_555 yes

   S(2)    Ru(1)   C(1)    C(2)    116(1)   1_555 1_555 1_555 1_555 yes

   S(2)    Ru(1)   C(1)    C(5)    -124(1)  1_555 1_555 1_555 1_555 yes

   S(2)    Ru(1)   C(1)    C(6)    1(1)     1_555 1_555 1_555 1_555 yes

   S(2)    Ru(1)   C(2)    C(1)    -67(1)   1_555 1_555 1_555 1_555 yes

   S(2)    Ru(1)   C(2)    C(3)    176(1)   1_555 1_555 1_555 1_555 yes

   S(2)    Ru(1)   C(2)    C(7)    59(3)    1_555 1_555 1_555 1_555 yes

   S(2)    Ru(1)   C(3)    C(2)    -5(2)    1_555 1_555 1_555 1_555 yes

   S(2)    Ru(1)   C(3)    C(4)    -117(2)  1_555 1_555 1_555 1_555 yes

   S(2)    Ru(1)   C(3)    C(8)    113(2)   1_555 1_555 1_555 1_555 yes

   S(2)    Ru(1)   C(4)    C(3)    113(2)   1_555 1_555 1_555 1_555 yes

   S(2)    Ru(1)   C(4)    C(5)    -9(2)    1_555 1_555 1_555 1_555 yes

   S(2)    Ru(1)   C(4)    C(9)    -129(2)  1_555 1_555 1_555 1_555 yes

   S(2)    Ru(1)   C(5)    C(1)    59(1)    1_555 1_555 1_555 1_555 yes

   S(2)    Ru(1)   C(5)    C(4)    174(1)   1_555 1_555 1_555 1_555 yes

   S(2)    Ru(1)   C(5)    C(10)   -66(3)   1_555 1_555 1_555 1_555 yes

   S(2)    Ru(1)   C(23)   C(24)   -128(17) 1_555 1_555 1_555 1_555 yes

   S(2)    Ru(2)   Ru(1)   C(1)    -59.3(9) 1_555 1_555 1_555 1_555 yes

   S(2)    Ru(2)   Ru(1)   C(2)    -28(1)   1_555 1_555 1_555 1_555 yes

   S(2)    Ru(2)   Ru(1)   C(3)    -162(2)  1_555 1_555 1_555 1_555 yes

   S(2)    Ru(2)   Ru(1)   C(4)    -132(1)  1_555 1_555 1_555 1_555 yes

   S(2)    Ru(2)   Ru(1)   C(5)    -96.3(8) 1_555 1_555 1_555 1_555 yes

   S(2)    Ru(2)   Ru(1)   C(23)   87.2(9)  1_555 1_555 1_555 1_555 yes

   S(2)    Ru(2)   S(1)    C(21)   103(1)   1_555 1_555 1_555 1_555 yes

   S(2)    Ru(2)   C(11)   C(12)   -150(1)  1_555 1_555 1_555 1_555 yes

   S(2)    Ru(2)   C(11)   C(15)   85(1)    1_555 1_555 1_555 1_555 yes

   S(2)    Ru(2)   C(11)   C(16)   -24(2)   1_555 1_555 1_555 1_555 yes

   S(2)    Ru(2)   C(12)   C(11)   35(2)    1_555 1_555 1_555 1_555 yes

   S(2)    Ru(2)   C(12)   C(13)   152(1)   1_555 1_555 1_555 1_555 yes

   S(2)    Ru(2)   C(12)   C(17)   -95(4)   1_555 1_555 1_555 1_555 yes

   S(2)    Ru(2)   C(13)   C(12)   -53(2)   1_555 1_555 1_555 1_555 yes

   S(2)    Ru(2)   C(13)   C(14)   66(2)    1_555 1_555 1_555 1_555 yes

   S(2)    Ru(2)   C(13)   C(18)   172(1)   1_555 1_555 1_555 1_555 yes

   S(2)    Ru(2)   C(14)   C(13)   -148(1)  1_555 1_555 1_555 1_555 yes

   S(2)    Ru(2)   C(14)   C(15)   -34(1)   1_555 1_555 1_555 1_555 yes

   S(2)    Ru(2)   C(14)   C(19)   86(2)    1_555 1_555 1_555 1_555 yes

   S(2)    Ru(2)   C(15)   C(11)   -95(1)   1_555 1_555 1_555 1_555 yes

   S(2)    Ru(2)   C(15)   C(14)   151(1)   1_555 1_555 1_555 1_555 yes

   S(2)    Ru(2)   C(15)   C(20)   33(2)    1_555 1_555 1_555 1_555 yes

   O(2)    C(42)   C(42)   C(43)   105(13)  1_555 1_555 4_354 1_555 yes

   O(2)    C(42)   C(42)   C(43)   -105(13) 1_555 1_555 4_354 4_354 yes

   O(2)    C(42)   C(43)   C(42)   -64(8)   1_555 1_555 1_555 4_354 yes

   O(2)    C(42)   C(43)   C(42)   63(11)   1_555 1_555 4_354 4_354 yes

   O(2)    C(42)   C(42)   C(43)   -105(13) 1_555 4_354 1_555 1_555 yes

   O(2)    C(42)   C(42)   C(43)   105(13)  1_555 4_354 1_555 4_354 yes

   O(2)    C(42)   C(43)   C(42)   63(11)   1_555 4_354 1_555 1_555 yes

   O(2)    C(42)   C(43)   C(42)   -64(8)   1_555 4_354 4_354 1_555 yes

   C(1)    Ru(1)   Ru(2)   C(11)   -24(1)   1_555 1_555 1_555 1_555 yes

   C(1)    Ru(1)   Ru(2)   C(12)   -40(11)  1_555 1_555 1_555 1_555 yes

   C(1)    Ru(1)   Ru(2)   C(13)   90(1)    1_555 1_555 1_555 1_555 yes

   C(1)    Ru(1)   Ru(2)   C(14)   54(1)    1_555 1_555 1_555 1_555 yes

   C(1)    Ru(1)   Ru(2)   C(15)   10(1)    1_555 1_555 1_555 1_555 yes

   C(1)    Ru(1)   S(1)    C(21)   148(1)   1_555 1_555 1_555 1_555 yes

   C(1)    Ru(1)   S(2)    C(22)   -113(1)  1_555 1_555 1_555 1_555 yes

   C(1)    Ru(1)   C(2)    C(3)    -115(2)  1_555 1_555 1_555 1_555 yes

   C(1)    Ru(1)   C(2)    C(7)    127(3)   1_555 1_555 1_555 1_555 yes

   C(1)    Ru(1)   C(3)    C(2)    39(1)    1_555 1_555 1_555 1_555 yes

   C(1)    Ru(1)   C(3)    C(4)    -72(1)   1_555 1_555 1_555 1_555 yes

   C(1)    Ru(1)   C(3)    C(8)    158(3)   1_555 1_555 1_555 1_555 yes

   C(1)    Ru(1)   C(4)    C(3)    85(1)    1_555 1_555 1_555 1_555 yes

   C(1)    Ru(1)   C(4)    C(5)    -37(1)   1_555 1_555 1_555 1_555 yes

   C(1)    Ru(1)   C(4)    C(9)    -158(3)  1_555 1_555 1_555 1_555 yes

   C(1)    Ru(1)   C(5)    C(4)    115(2)   1_555 1_555 1_555 1_555 yes

   C(1)    Ru(1)   C(5)    C(10)   -125(3)  1_555 1_555 1_555 1_555 yes

   C(1)    Ru(1)   C(23)   C(24)   -38(18)  1_555 1_555 1_555 1_555 yes

   C(1)    C(2)    Ru(1)   C(3)    115(2)   1_555 1_555 1_555 1_555 yes

   C(1)    C(2)    Ru(1)   C(4)    75(1)    1_555 1_555 1_555 1_555 yes

   C(1)    C(2)    Ru(1)   C(5)    34(1)    1_555 1_555 1_555 1_555 yes

   C(1)    C(2)    Ru(1)   C(23)   -161(1)  1_555 1_555 1_555 1_555 yes

   C(1)    C(2)    C(3)    C(4)    0(3)     1_555 1_555 1_555 1_555 yes

   C(1)    C(2)    C(3)    C(8)    173(2)   1_555 1_555 1_555 1_555 yes

   C(1)    C(5)    Ru(1)   C(2)    -38(1)   1_555 1_555 1_555 1_555 yes

   C(1)    C(5)    Ru(1)   C(3)    -80(1)   1_555 1_555 1_555 1_555 yes

   C(1)    C(5)    Ru(1)   C(4)    -115(2)  1_555 1_555 1_555 1_555 yes

   C(1)    C(5)    Ru(1)   C(23)   -70(2)   1_555 1_555 1_555 1_555 yes

   C(1)    C(5)    C(4)    C(3)    0(3)     1_555 1_555 1_555 1_555 yes

   C(1)    C(5)    C(4)    C(9)    -177(2)  1_555 1_555 1_555 1_555 yes

   C(2)    Ru(1)   Ru(2)   C(11)   7(2)     1_555 1_555 1_555 1_555 yes

   C(2)    Ru(1)   Ru(2)   C(12)   -9(12)   1_555 1_555 1_555 1_555 yes

   C(2)    Ru(1)   Ru(2)   C(13)   121(2)   1_555 1_555 1_555 1_555 yes

   C(2)    Ru(1)   Ru(2)   C(14)   85(1)    1_555 1_555 1_555 1_555 yes

   C(2)    Ru(1)   Ru(2)   C(15)   41(1)    1_555 1_555 1_555 1_555 yes

   C(2)    Ru(1)   S(1)    C(21)   88(1)    1_555 1_555 1_555 1_555 yes

   C(2)    Ru(1)   S(2)    C(22)   -78(1)   1_555 1_555 1_555 1_555 yes

   C(2)    Ru(1)   C(1)    C(5)    118(2)   1_555 1_555 1_555 1_555 yes

   C(2)    Ru(1)   C(1)    C(6)    -115(2)  1_555 1_555 1_555 1_555 yes

   C(2)    Ru(1)   C(3)    C(4)    -111(2)  1_555 1_555 1_555 1_555 yes

   C(2)    Ru(1)   C(3)    C(8)    119(4)   1_555 1_555 1_555 1_555 yes

   C(2)    Ru(1)   C(4)    C(3)    40(1)    1_555 1_555 1_555 1_555 yes

   C(2)    Ru(1)   C(4)    C(5)    -82(1)   1_555 1_555 1_555 1_555 yes

   C(2)    Ru(1)   C(4)    C(9)    156(3)   1_555 1_555 1_555 1_555 yes

   C(2)    Ru(1)   C(5)    C(4)    76(2)    1_555 1_555 1_555 1_555 yes

   C(2)    Ru(1)   C(5)    C(10)   -163(3)  1_555 1_555 1_555 1_555 yes

   C(2)    Ru(1)   C(23)   C(24)   -23(17)  1_555 1_555 1_555 1_555 yes

   C(2)    C(1)    Ru(1)   C(3)    -37(1)   1_555 1_555 1_555 1_555 yes

   C(2)    C(1)    Ru(1)   C(4)    -79(1)   1_555 1_555 1_555 1_555 yes

   C(2)    C(1)    Ru(1)   C(5)    -118(2)  1_555 1_555 1_555 1_555 yes

   C(2)    C(1)    Ru(1)   C(23)   24(2)    1_555 1_555 1_555 1_555 yes

   C(2)    C(1)    C(5)    C(4)    -1(2)    1_555 1_555 1_555 1_555 yes

   C(2)    C(1)    C(5)    C(10)   -169(2)  1_555 1_555 1_555 1_555 yes

   C(2)    C(3)    Ru(1)   C(4)    111(2)   1_555 1_555 1_555 1_555 yes

   C(2)    C(3)    Ru(1)   C(5)    78(1)    1_555 1_555 1_555 1_555 yes

   C(2)    C(3)    Ru(1)   C(23)   -97(1)   1_555 1_555 1_555 1_555 yes

   C(2)    C(3)    C(4)    C(5)    0(3)     1_555 1_555 1_555 1_555 yes

   C(2)    C(3)    C(4)    C(9)    178(2)   1_555 1_555 1_555 1_555 yes

   C(3)    Ru(1)   Ru(2)   C(11)   -126(2)  1_555 1_555 1_555 1_555 yes

   C(3)    Ru(1)   Ru(2)   C(12)   -143(12) 1_555 1_555 1_555 1_555 yes

   C(3)    Ru(1)   Ru(2)   C(13)   -12(2)   1_555 1_555 1_555 1_555 yes

   C(3)    Ru(1)   Ru(2)   C(14)   -48(2)   1_555 1_555 1_555 1_555 yes

   C(3)    Ru(1)   Ru(2)   C(15)   -92(2)   1_555 1_555 1_555 1_555 yes

   C(3)    Ru(1)   S(1)    C(21)   76(1)    1_555 1_555 1_555 1_555 yes

   C(3)    Ru(1)   S(2)    C(22)   -74(1)   1_555 1_555 1_555 1_555 yes

   C(3)    Ru(1)   C(1)    C(5)    80(1)    1_555 1_555 1_555 1_555 yes

   C(3)    Ru(1)   C(1)    C(6)    -152(2)  1_555 1_555 1_555 1_555 yes

   C(3)    Ru(1)   C(2)    C(7)    -117(3)  1_555 1_555 1_555 1_555 yes

   C(3)    Ru(1)   C(4)    C(5)    -122(2)  1_555 1_555 1_555 1_555 yes

   C(3)    Ru(1)   C(4)    C(9)    116(3)   1_555 1_555 1_555 1_555 yes

   C(3)    Ru(1)   C(5)    C(4)    34(1)    1_555 1_555 1_555 1_555 yes

   C(3)    Ru(1)   C(5)    C(10)   153(3)   1_555 1_555 1_555 1_555 yes

   C(3)    Ru(1)   C(23)   C(24)   13(17)   1_555 1_555 1_555 1_555 yes

   C(3)    C(2)    Ru(1)   C(4)    -40(1)   1_555 1_555 1_555 1_555 yes

   C(3)    C(2)    Ru(1)   C(5)    -81(1)   1_555 1_555 1_555 1_555 yes

   C(3)    C(2)    Ru(1)   C(23)   83(1)    1_555 1_555 1_555 1_555 yes

   C(3)    C(2)    C(1)    C(5)    1(3)     1_555 1_555 1_555 1_555 yes

   C(3)    C(2)    C(1)    C(6)    -175(2)  1_555 1_555 1_555 1_555 yes

   C(3)    C(4)    Ru(1)   C(5)    122(2)   1_555 1_555 1_555 1_555 yes

   C(3)    C(4)    Ru(1)   C(23)   -33(2)   1_555 1_555 1_555 1_555 yes

   C(3)    C(4)    C(5)    C(10)   169(2)   1_555 1_555 1_555 1_555 yes

   C(4)    Ru(1)   Ru(2)   C(11)   -97(1)   1_555 1_555 1_555 1_555 yes

   C(4)    Ru(1)   Ru(2)   C(12)   -113(11) 1_555 1_555 1_555 1_555 yes

   C(4)    Ru(1)   Ru(2)   C(13)   16(1)    1_555 1_555 1_555 1_555 yes

   C(4)    Ru(1)   Ru(2)   C(14)   -19(1)   1_555 1_555 1_555 1_555 yes

   C(4)    Ru(1)   Ru(2)   C(15)   -62(1)   1_555 1_555 1_555 1_555 yes

   C(4)    Ru(1)   S(1)    C(21)   107(1)   1_555 1_555 1_555 1_555 yes

   C(4)    Ru(1)   S(2)    C(22)   -136(1)  1_555 1_555 1_555 1_555 yes

   C(4)    Ru(1)   C(1)    C(5)    38(1)    1_555 1_555 1_555 1_555 yes

   C(4)    Ru(1)   C(1)    C(6)    165(2)   1_555 1_555 1_555 1_555 yes

   C(4)    Ru(1)   C(2)    C(7)    -157(3)  1_555 1_555 1_555 1_555 yes

   C(4)    Ru(1)   C(3)    C(8)    -129(4)  1_555 1_555 1_555 1_555 yes

   C(4)    Ru(1)   C(5)    C(10)   119(4)   1_555 1_555 1_555 1_555 yes

   C(4)    Ru(1)   C(23)   C(24)   32(17)   1_555 1_555 1_555 1_555 yes

   C(4)    C(3)    Ru(1)   C(5)    -33(1)   1_555 1_555 1_555 1_555 yes

   C(4)    C(3)    Ru(1)   C(23)   151(2)   1_555 1_555 1_555 1_555 yes

   C(4)    C(3)    C(2)    C(7)    -166(2)  1_555 1_555 1_555 1_555 yes

   C(4)    C(5)    Ru(1)   C(23)   44(3)    1_555 1_555 1_555 1_555 yes

   C(4)    C(5)    C(1)    C(6)    175(2)   1_555 1_555 1_555 1_555 yes

   C(5)    Ru(1)   Ru(2)   C(11)   -61(1)   1_555 1_555 1_555 1_555 yes

   C(5)    Ru(1)   Ru(2)   C(12)   -77(11)  1_555 1_555 1_555 1_555 yes

   C(5)    Ru(1)   Ru(2)   C(13)   53(1)    1_555 1_555 1_555 1_555 yes

   C(5)    Ru(1)   Ru(2)   C(14)   17(1)    1_555 1_555 1_555 1_555 yes

   C(5)    Ru(1)   Ru(2)   C(15)   -26(1)   1_555 1_555 1_555 1_555 yes

   C(5)    Ru(1)   S(1)    C(21)   141(1)   1_555 1_555 1_555 1_555 yes

   C(5)    Ru(1)   S(2)    C(22)   -142(1)  1_555 1_555 1_555 1_555 yes

   C(5)    Ru(1)   C(1)    C(6)    126(2)   1_555 1_555 1_555 1_555 yes

   C(5)    Ru(1)   C(2)    C(7)    161(3)   1_555 1_555 1_555 1_555 yes

   C(5)    Ru(1)   C(3)    C(8)    -162(3)  1_555 1_555 1_555 1_555 yes

   C(5)    Ru(1)   C(4)    C(9)    -120(4)  1_555 1_555 1_555 1_555 yes

   C(5)    Ru(1)   C(23)   C(24)   4(19)    1_555 1_555 1_555 1_555 yes

   C(5)    C(1)    Ru(1)   C(23)   142(1)   1_555 1_555 1_555 1_555 yes

   C(5)    C(1)    C(2)    C(7)    165(2)   1_555 1_555 1_555 1_555 yes

   C(5)    C(4)    Ru(1)   C(23)   -156(1)  1_555 1_555 1_555 1_555 yes

   C(5)    C(4)    C(3)    C(8)    -174(2)  1_555 1_555 1_555 1_555 yes

   C(6)    C(1)    Ru(1)   C(23)   -90(2)   1_555 1_555 1_555 1_555 yes

   C(6)    C(1)    C(2)    C(7)    -11(4)   1_555 1_555 1_555 1_555 yes

   C(6)    C(1)    C(5)    C(10)   7(4)     1_555 1_555 1_555 1_555 yes

   C(7)    C(2)    Ru(1)   C(23)   -33(3)   1_555 1_555 1_555 1_555 yes

   C(7)    C(2)    C(3)    C(8)    7(4)     1_555 1_555 1_555 1_555 yes

   C(8)    C(3)    Ru(1)   C(23)   22(3)    1_555 1_555 1_555 1_555 yes

   C(8)    C(3)    C(4)    C(9)    4(4)     1_555 1_555 1_555 1_555 yes

   C(9)    C(4)    Ru(1)   C(23)   82(3)    1_555 1_555 1_555 1_555 yes

   C(9)    C(4)    C(5)    C(10)   -8(4)    1_555 1_555 1_555 1_555 yes

   C(10)   C(5)    Ru(1)   C(23)   163(2)   1_555 1_555 1_555 1_555 yes

   C(11)   Ru(2)   Ru(1)   C(23)   122(1)   1_555 1_555 1_555 1_555 yes

   C(11)   Ru(2)   S(1)    C(21)   -120(2)  1_555 1_555 1_555 1_555 yes

   C(11)   Ru(2)   S(2)    C(22)   94(1)    1_555 1_555 1_555 1_555 yes

   C(11)   Ru(2)   C(12)   C(13)   116(2)   1_555 1_555 1_555 1_555 yes

   C(11)   Ru(2)   C(12)   C(17)   -131(5)  1_555 1_555 1_555 1_555 yes

   C(11)   Ru(2)   C(13)   C(12)   -37(1)   1_555 1_555 1_555 1_555 yes

   C(11)   Ru(2)   C(13)   C(14)   82(1)    1_555 1_555 1_555 1_555 yes

   C(11)   Ru(2)   C(13)   C(18)   -170(3)  1_555 1_555 1_555 1_555 yes

   C(11)   Ru(2)   C(14)   C(13)   -74(1)   1_555 1_555 1_555 1_555 yes

   C(11)   Ru(2)   C(14)   C(15)   39(1)    1_555 1_555 1_555 1_555 yes

   C(11)   Ru(2)   C(14)   C(19)   160(2)   1_555 1_555 1_555 1_555 yes

   C(11)   Ru(2)   C(15)   C(14)   -113(2)  1_555 1_555 1_555 1_555 yes

   C(11)   Ru(2)   C(15)   C(20)   128(3)   1_555 1_555 1_555 1_555 yes

   C(11)   C(12)   Ru(2)   C(13)   -116(2)  1_555 1_555 1_555 1_555 yes

   C(11)   C(12)   Ru(2)   C(14)   -78(1)   1_555 1_555 1_555 1_555 yes

   C(11)   C(12)   Ru(2)   C(15)   -34(1)   1_555 1_555 1_555 1_555 yes

   C(11)   C(12)   C(13)   C(14)   -4(3)    1_555 1_555 1_555 1_555 yes

   C(11)   C(12)   C(13)   C(18)   179(2)   1_555 1_555 1_555 1_555 yes

   C(11)   C(15)   Ru(2)   C(12)   32(1)    1_555 1_555 1_555 1_555 yes

   C(11)   C(15)   Ru(2)   C(13)   72(1)    1_555 1_555 1_555 1_555 yes

   C(11)   C(15)   Ru(2)   C(14)   113(2)   1_555 1_555 1_555 1_555 yes

   C(11)   C(15)   C(14)   C(13)   2(2)     1_555 1_555 1_555 1_555 yes

   C(11)   C(15)   C(14)   C(19)   173(2)   1_555 1_555 1_555 1_555 yes

   C(12)   Ru(2)   Ru(1)   C(23)   106(11)  1_555 1_555 1_555 1_555 yes

   C(12)   Ru(2)   S(1)    C(21)   -74(1)   1_555 1_555 1_555 1_555 yes

   C(12)   Ru(2)   S(2)    C(22)   74(1)    1_555 1_555 1_555 1_555 yes

   C(12)   Ru(2)   C(11)   C(15)   -123(2)  1_555 1_555 1_555 1_555 yes

   C(12)   Ru(2)   C(11)   C(16)   125(3)   1_555 1_555 1_555 1_555 yes

   C(12)   Ru(2)   C(13)   C(14)   120(2)   1_555 1_555 1_555 1_555 yes

   C(12)   Ru(2)   C(13)   C(18)   -133(3)  1_555 1_555 1_555 1_555 yes

   C(12)   Ru(2)   C(14)   C(13)   -33(1)   1_555 1_555 1_555 1_555 yes

   C(12)   Ru(2)   C(14)   C(15)   79(1)    1_555 1_555 1_555 1_555 yes

   C(12)   Ru(2)   C(14)   C(19)   -158(2)  1_555 1_555 1_555 1_555 yes

   C(12)   Ru(2)   C(15)   C(14)   -80(1)   1_555 1_555 1_555 1_555 yes

   C(12)   Ru(2)   C(15)   C(20)   161(3)   1_555 1_555 1_555 1_555 yes

   C(12)   C(11)   Ru(2)   C(13)   36(1)    1_555 1_555 1_555 1_555 yes

   C(12)   C(11)   Ru(2)   C(14)   82(1)    1_555 1_555 1_555 1_555 yes

   C(12)   C(11)   Ru(2)   C(15)   123(2)   1_555 1_555 1_555 1_555 yes

   C(12)   C(11)   C(15)   C(14)   -5(3)    1_555 1_555 1_555 1_555 yes

   C(12)   C(11)   C(15)   C(20)   173(3)   1_555 1_555 1_555 1_555 yes

   C(12)   C(13)   Ru(2)   C(14)   -120(2)  1_555 1_555 1_555 1_555 yes

   C(12)   C(13)   Ru(2)   C(15)   -80(1)   1_555 1_555 1_555 1_555 yes

   C(12)   C(13)   C(14)   C(15)   1(2)     1_555 1_555 1_555 1_555 yes

   C(12)   C(13)   C(14)   C(19)   -169(2)  1_555 1_555 1_555 1_555 yes

   C(13)   Ru(2)   Ru(1)   C(23)   -123(1)  1_555 1_555 1_555 1_555 yes

   C(13)   Ru(2)   S(1)    C(21)   -91(1)   1_555 1_555 1_555 1_555 yes

   C(13)   Ru(2)   S(2)    C(22)   108(2)   1_555 1_555 1_555 1_555 yes

   C(13)   Ru(2)   C(11)   C(15)   -86(1)   1_555 1_555 1_555 1_555 yes

   C(13)   Ru(2)   C(11)   C(16)   162(3)   1_555 1_555 1_555 1_555 yes

   C(13)   Ru(2)   C(12)   C(17)   111(5)   1_555 1_555 1_555 1_555 yes

   C(13)   Ru(2)   C(14)   C(15)   113(2)   1_555 1_555 1_555 1_555 yes

   C(13)   Ru(2)   C(14)   C(19)   -124(3)  1_555 1_555 1_555 1_555 yes

   C(13)   Ru(2)   C(15)   C(14)   -40(1)   1_555 1_555 1_555 1_555 yes

   C(13)   Ru(2)   C(15)   C(20)   -158(3)  1_555 1_555 1_555 1_555 yes

   C(13)   C(12)   Ru(2)   C(14)   38(1)    1_555 1_555 1_555 1_555 yes

   C(13)   C(12)   Ru(2)   C(15)   81(1)    1_555 1_555 1_555 1_555 yes

   C(13)   C(12)   C(11)   C(15)   6(3)     1_555 1_555 1_555 1_555 yes

   C(13)   C(12)   C(11)   C(16)   179(2)   1_555 1_555 1_555 1_555 yes

   C(13)   C(14)   Ru(2)   C(15)   -113(2)  1_555 1_555 1_555 1_555 yes

   C(13)   C(14)   C(15)   C(20)   -177(2)  1_555 1_555 1_555 1_555 yes

   C(14)   Ru(2)   Ru(1)   C(23)   -159(1)  1_555 1_555 1_555 1_555 yes

   C(14)   Ru(2)   S(1)    C(21)   -130(1)  1_555 1_555 1_555 1_555 yes

   C(14)   Ru(2)   S(2)    C(22)   153(1)   1_555 1_555 1_555 1_555 yes

   C(14)   Ru(2)   C(11)   C(15)   -40(1)   1_555 1_555 1_555 1_555 yes

   C(14)   Ru(2)   C(11)   C(16)   -151(3)  1_555 1_555 1_555 1_555 yes

   C(14)   Ru(2)   C(12)   C(17)   150(4)   1_555 1_555 1_555 1_555 yes

   C(14)   Ru(2)   C(13)   C(18)   106(3)   1_555 1_555 1_555 1_555 yes

   C(14)   Ru(2)   C(15)   C(20)   -117(3)  1_555 1_555 1_555 1_555 yes

   C(14)   C(13)   Ru(2)   C(15)   39(1)    1_555 1_555 1_555 1_555 yes

   C(14)   C(13)   C(12)   C(17)   170(2)   1_555 1_555 1_555 1_555 yes

   C(14)   C(15)   C(11)   C(16)   -179(2)  1_555 1_555 1_555 1_555 yes

   C(15)   Ru(2)   Ru(1)   C(23)   157(1)   1_555 1_555 1_555 1_555 yes

   C(15)   Ru(2)   S(1)    C(21)   -155(1)  1_555 1_555 1_555 1_555 yes

   C(15)   Ru(2)   S(2)    C(22)   131(1)   1_555 1_555 1_555 1_555 yes

   C(15)   Ru(2)   C(11)   C(16)   -110(3)  1_555 1_555 1_555 1_555 yes

   C(15)   Ru(2)   C(12)   C(17)   -166(4)  1_555 1_555 1_555 1_555 yes

   C(15)   Ru(2)   C(13)   C(18)   146(3)   1_555 1_555 1_555 1_555 yes

   C(15)   Ru(2)   C(14)   C(19)   121(3)   1_555 1_555 1_555 1_555 yes

   C(15)   C(11)   C(12)   C(17)   -166(3)  1_555 1_555 1_555 1_555 yes

   C(15)   C(14)   C(13)   C(18)   178(1)   1_555 1_555 1_555 1_555 yes

   C(16)   C(11)   C(12)   C(17)   5(5)     1_555 1_555 1_555 1_555 yes

   C(16)   C(11)   C(15)   C(20)   0(4)     1_555 1_555 1_555 1_555 yes

   C(17)   C(12)   C(13)   C(18)   -6(5)    1_555 1_555 1_555 1_555 yes

   C(18)   C(13)   C(14)   C(19)   7(3)     1_555 1_555 1_555 1_555 yes

   C(19)   C(14)   C(15)   C(20)   -6(3)    1_555 1_555 1_555 1_555 yes

   C(21)   S(1)    Ru(1)   C(23)   -12(1)   1_555 1_555 1_555 1_555 yes

   C(22)   S(2)    Ru(1)   C(23)   15(1)    1_555 1_555 1_555 1_555 yes

   C(23)   C(24)   C(25)   C(26)   -140(33) 1_555 1_555 1_555 1_555 yes

   C(23)   C(24)   C(25)   C(34)   48(34)   1_555 1_555 1_555 1_555 yes

   C(24)   C(25)   C(26)   C(27)   -24(3)   1_555 1_555 1_555 1_555 yes

   C(24)   C(25)   C(26)   C(32)   154(2)   1_555 1_555 1_555 1_555 yes

   C(24)   C(25)   C(34)   C(33)   -37(3)   1_555 1_555 1_555 1_555 yes

   C(24)   C(25)   C(34)   C(36)   140(2)   1_555 1_555 1_555 1_555 yes

   C(25)   C(26)   C(27)   C(28)   173(2)   1_555 1_555 1_555 1_555 yes

   C(25)   C(26)   C(32)   C(31)   -174(2)  1_555 1_555 1_555 1_555 yes

   C(25)   C(34)   C(33)   C(35)   177(2)   1_555 1_555 1_555 1_555 yes

   C(25)   C(34)   C(36)   C(38)   -174(2)  1_555 1_555 1_555 1_555 yes

   C(26)   C(25)   C(34)   C(33)   152(2)   1_555 1_555 1_555 1_555 yes

   C(26)   C(25)   C(34)   C(36)   -28(3)   1_555 1_555 1_555 1_555 yes

   C(26)   C(27)   C(28)   C(29)   5(4)     1_555 1_555 1_555 1_555 yes

   C(26)   C(32)   C(31)   C(29)   -2(4)    1_555 1_555 1_555 1_555 yes

   C(27)   C(26)   C(25)   C(34)   144(2)   1_555 1_555 1_555 1_555 yes

   C(27)   C(26)   C(32)   C(31)   4(4)     1_555 1_555 1_555 1_555 yes

   C(27)   C(28)   C(29)   C(30)   177(2)   1_555 1_555 1_555 1_555 yes

   C(27)   C(28)   C(29)   C(31)   -3(4)    1_555 1_555 1_555 1_555 yes

   C(28)   C(27)   C(26)   C(32)   -5(4)    1_555 1_555 1_555 1_555 yes

   C(28)   C(29)   C(31)   C(32)   2(4)     1_555 1_555 1_555 1_555 yes

   C(30)   C(29)   C(31)   C(32)   -178(2)  1_555 1_555 1_555 1_555 yes

   C(32)   C(26)   C(25)   C(34)   -36(3)   1_555 1_555 1_555 1_555 yes

   C(33)   C(34)   C(36)   C(38)   4(3)     1_555 1_555 1_555 1_555 yes

   C(33)   C(35)   C(37)   C(38)   -1(4)    1_555 1_555 1_555 1_555 yes

   C(33)   C(35)   C(37)   C(39)   -176(2)  1_555 1_555 1_555 1_555 yes

   C(34)   C(33)   C(35)   C(37)   0(4)     1_555 1_555 1_555 1_555 yes

   C(34)   C(36)   C(38)   C(37)   -5(3)    1_555 1_555 1_555 1_555 yes

   C(35)   C(33)   C(34)   C(36)   -1(3)    1_555 1_555 1_555 1_555 yes

   C(35)   C(37)   C(38)   C(36)   4(4)     1_555 1_555 1_555 1_555 yes

   C(36)   C(38)   C(37)   C(39)   -179(2)  1_555 1_555 1_555 1_555 yes

   C(42)   O(2)    C(42)   C(43)   -40(7)   1_555 1_555 4_354 1_555 yes

   C(42)   O(2)    C(42)   C(43)   74(17)   1_555 1_555 4_354 4_354 yes

   C(42)   C(43)   C(42)   C(43)   -34(28)  1_555 1_555 4_354 4_354 yes

   C(42)   C(43)   C(42)   C(43)   22(18)   1_555 4_354 4_354 1_555 yes

   C(43)   C(42)   C(42)   C(43)   148(27)  1_555 1_555 4_354 4_354 yes

   C(43)   C(42)   C(43)   C(42)   -34(28)  1_555 1_555 4_354 4_354 yes

   C(43)   C(42)   C(42)   C(43)   -148(27) 1_555 4_354 1_555 4_354 yes

   C(43)   C(42)   C(43)   C(42)   22(18)   1_555 4_354 4_354 1_555 yes

#------------------------------------------------------------------------------

loop_

_geom_contact_atom_site_label_1

_geom_contact_atom_site_label_2

_geom_contact_distance

_geom_contact_site_symmetry_1

_geom_contact_site_symmetry_2

_geom_contact_publ_flag

 Ru(1)     Ru(2)     2.768(3)   1_555 1_555 ?

 F(1)      F(1)      2.7(1)     1_555 4_353 ?

 F(1)      C(21)     3.16(6)    1_555 7_344 ?

 F(1)      C(9)      3.31(6)    1_555 6_344 ?

 F(1)      C(28)     3.59(6)    1_555 6_444 ?

 F(2)      C(21)     3.47(5)    1_555 7_344 ?

 F(2)      C(10)     3.49(5)    1_555 7_444 ?

 O(1)      C(38)     3.57(4)    1_555 1_555 ?

 O(1)      C(17)     3.57(4)    1_555 6_445 ?

 O(2)      C(31)     3.2(1)     1_555 5_455 ?

 O(2)      C(31)     3.2(1)     1_555 8_354 ?

 C(11)     C(39)     3.48(4)    1_555 5_555 ?

 C(13)     C(38)     3.52(3)    1_555 5_555 ?

 C(15)     C(39)     3.59(4)    1_555 5_555 ?

 C(28)     B(1)      3.3(3)     1_555 6_544 ?

 C(35)     C(40)     3.40(10)   1_555 1_655 ?

 C(35)     C(41)     3.58(7)    1_555 1_655 ?

 C(37)     C(39)     3.46(4)    1_555 2_545 ?

 C(38)     C(39)     3.60(4)    1_555 2_545 ?

#------------------------------------------------------------------------------


_publ_contact_author_name           ' ENTER NAME'


_publ_contact_author_address

;

    ENTER ADDRESS

;

_publ_contact_author_email            ' ENTER EMAIL ADDRESS '

_publ_contact_author_fax              ' ENTER FAX NUMBER '

_publ_contact_author_phone            ' ENTER PHONE NUMBER '

_publ_contact_letter

;

    ENTER TEXT OF LETTER

;

_publ_requested_journal               ' ENTER JOURNAL NAME HERE'

_publ_requested_category              ' CHOOSE FI FM FO CI CM CO or AD'


_publ_requested_coeditor_name          ?


_publ_section_title

;

    ENTER SECTION TITLE

;


_publ_section_title_footnote

;

    ENTER FOOTNOTE TO TITLE OF PAPER

;

loop_

_publ_author_name

_publ_author_footnote

_publ_author_address' FIRST AUTHORS NAME '

;

  FIRST AUTHORS ADDRESS

;


_publ_section_synopsis

;

    ENTER SYNOPSIS

;


_publ_section_abstract

;

    ENTER ABSTRACT

;


_publ_section_comment

;

    ENTER TEXT

;


_publ_section_acknowledgements

;

    ENTER ACKNOWLEDGEMENTS

;


_publ_section_experimental

;

    ENTER EXPERIMENTAL SECTION

;


_publ_section_references

;

    ENTER OTHER REFERENCES

Molecular Structure Corporation, Rigaku Corporation. (1998). teXsan.

Single Crystal Structure Analysis Software. Version 1.9.

MSC, 3200 Research Forest Drive, The Woodlands, TX 77381, USA.

Rigaku, 3-9-12 Akishima, Tokyo, Japan.

North, A.C.T., Phillips, D. C. & Mathews, F. S. (1968).

Acta Cryst. A24, 351-359.

;


_publ_section_table_legends

;

    ENTER TABLE LEGENDS

;


_publ_section_figure_captions

;

    ENTER FIGURE CAPTIONS

;


_publ_section_exptl_prep

;

    ENTER COMPOUND PREPARATION DETAILS

;


_publ_section_exptl_refinement

;

    ENTER SPECIAL DETAILS OF THE REFINEMENT

;

#===END
